# Supplementary figures and images for: A reliable method for detecting complexed DNA in vitro
Source: Royal Society of Chemistry journal article supplement (doi:10.1039/c0nr00456a), 2010-01-01

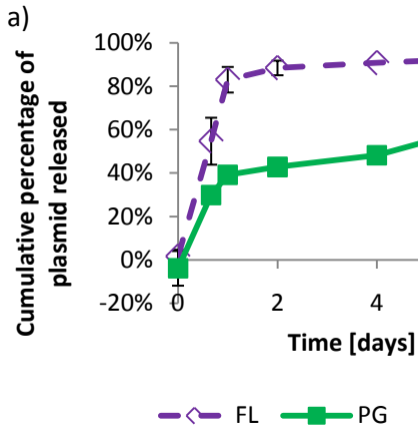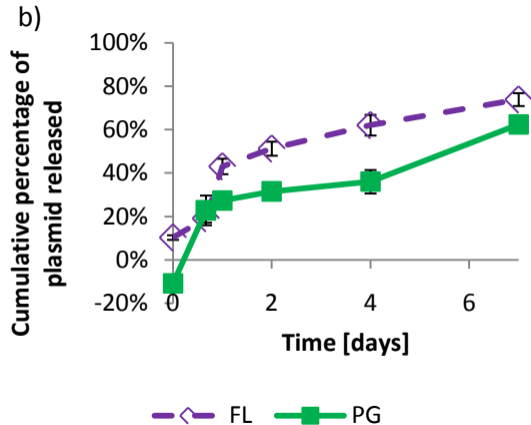

Supplement: c0nr00456a-f1.pdf [file c0nr00456a-f1.pdf]

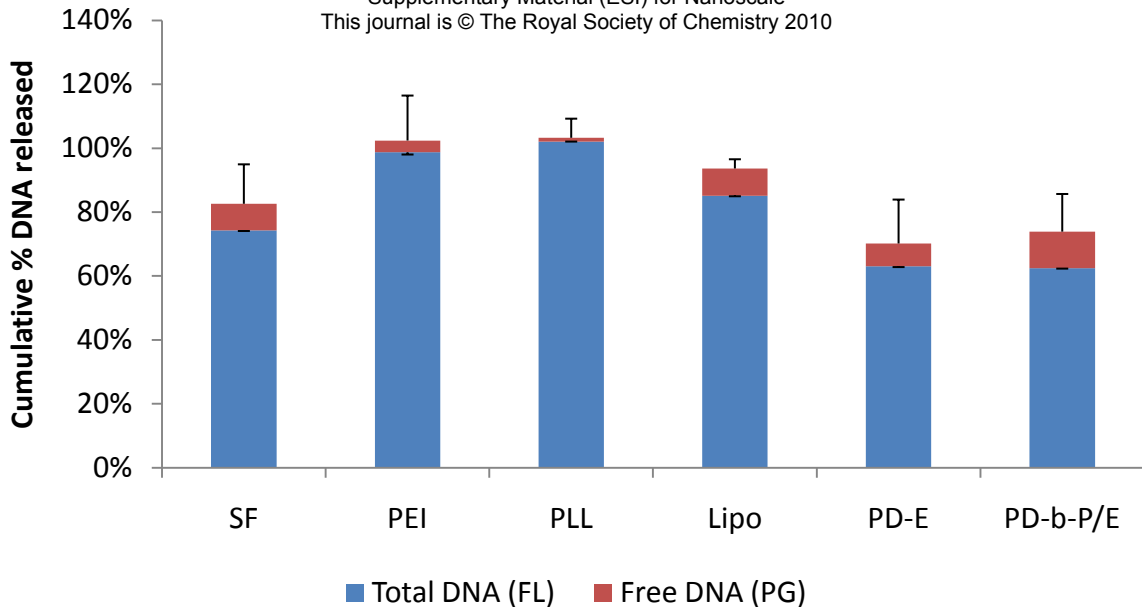

Supplement: c0nr00456a-f2.pdf [file c0nr00456a-f2.pdf]
